# Supplementary material
Source: publisher figshare collection journal article supplement (https://future-science-group.figshare.com/ndownloader/files/31670273)
Supplement: Supplementary file 1 [file 31670273]

Supplemental information

TABLE S1. Embase® and MEDLINE® Search Strategy

| No. | Query | Records |
| --- | --- | --- |
| 1 | 'non small cell lung cancer':ab,ti OR nsclc:ab,ti OR 'lung adenocarcinoma':ab,ti OR 'lung cancer':ab,ti | 253,822 |
| 2 | biomarker:ti OR 'tumor marker*':ti OR 'diagnostic marker':ti OR egfr:ti OR 'epidermal growth factor receptor':ti OR kras:ti OR alk:ti OR 'anaplastic lymphoma kinase':ti OR braf:ti OR 'vascular endothelial growth factor':ti OR vegf:ti OR ngs:ti OR 'next generation sequencing':ti OR met:ti OR ret:ti OR ros1:ti OR erbb2:ti OR her2:ti OR t790:ti OR 'human epidermal growth factor receptor':ti OR 'mitogen-activated protein kinase kinase':ti OR mek1:ti OR map2k1:ti OR 'fibroblast growth factor receptor':ti OR fgfr:ti OR 'programmed death protein':ti OR 'pd-1 ligand':ti OR 'pd l1':ti OR 'pd 1':ti OR pdl1:ti OR 'met exon 14 skipping mutations':ti OR 'metex14':ti OR 'target* therap*':ti OR 'precision medicine':ti | 214,674 |
| 3 | #1 AND #2 | 29,328 |
| 4 | 'next-generation sequencing':ab,ti OR ngs:ti OR multiplexi*:ti OR ((biops* NEAR/3 (tissue OR solid OR liquid OR blood)):ab,ti) | 77,935 |
| 5 | challange*:ab,ti OR waiting:ab,ti OR 'test* rate*':ab,ti OR ((treatment NEAR/2 delay*):ab,ti) OR delay*:ti | 165,451 |
| 6 | #3 AND (#4 OR #5) | 2,602 |
